# Supplementary material
Source: PubMed Central journal article supplement (PMC3197828)

## Supplementary Material

### Figure Legends

**Supplementary Figure 1.** Change in Callosal Thickness between Different Age Groups. The rows A-F display the change in callosal thickness between consecutive age groups. The color bar encodes the increase in distance to the medial core, with the maximum at 0.8 mm. Gray regions indicate no change or decrease. Growth peaks (i.e., more than 0.4 mm increase in distance to the medial core) are marked by red arrows.

**Supplementary Figure 2.** The left panel displays significant correlations between callosal thickness within right handers (RH) and non-right handers (non-RH), and in right handers (RH) only. Both correlation profiles are strikingly similar. The right panel displays differences between right-handers (RH) and non-right handers (non-RH). There were no significant group differences at  $p \leq 0.05$  (uncorrected).

# Change in Callosal Thickness between Different Age Groups

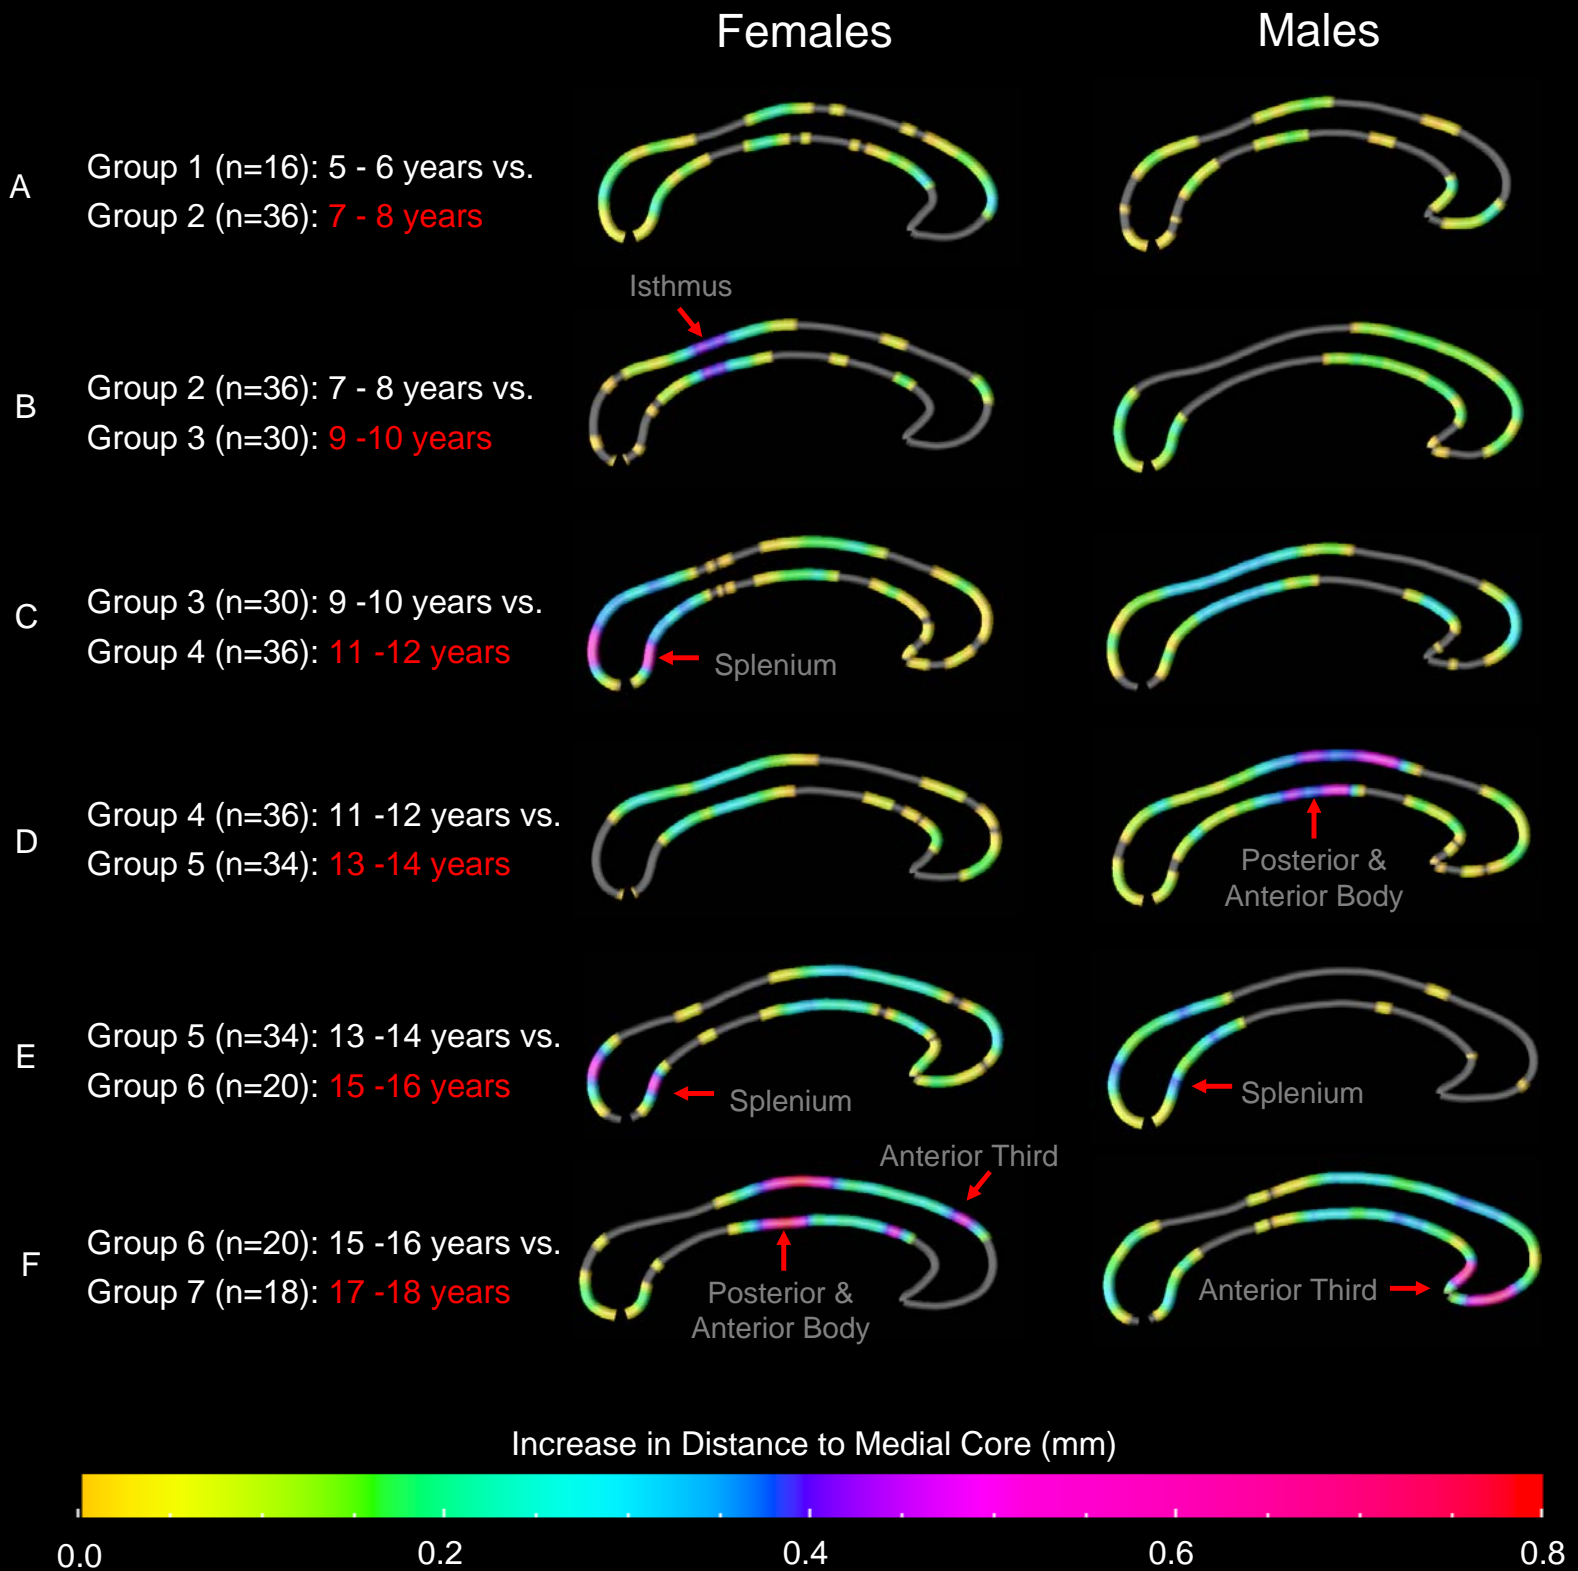

## Significant Correlations between Callosal Thickness and Age

## Significant Differences between Right Handers and non-Right Handers

RH and non-RH (n=190)

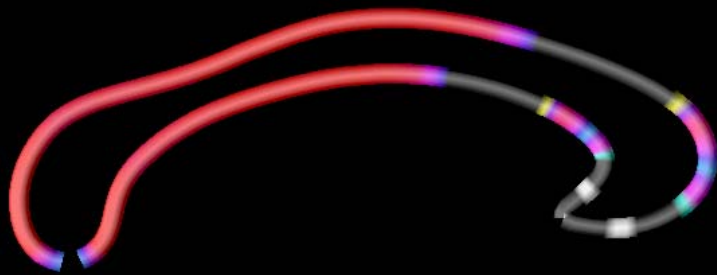

RH only (n=166)

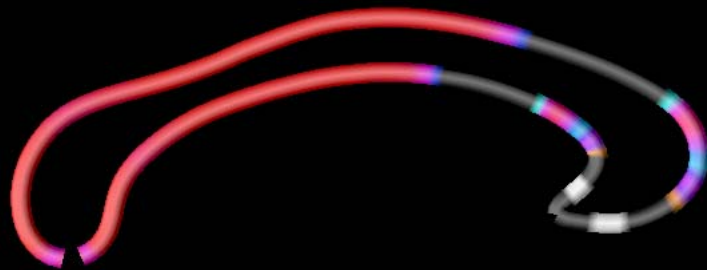

RH > non-RH

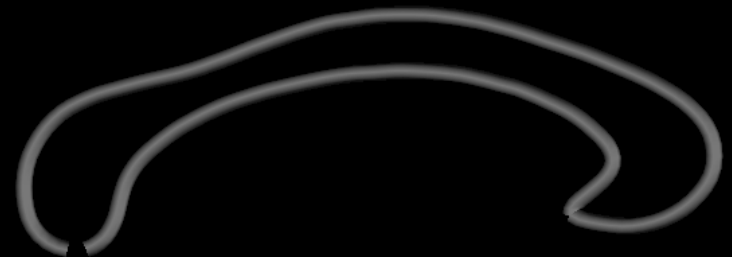

RH < non-RH

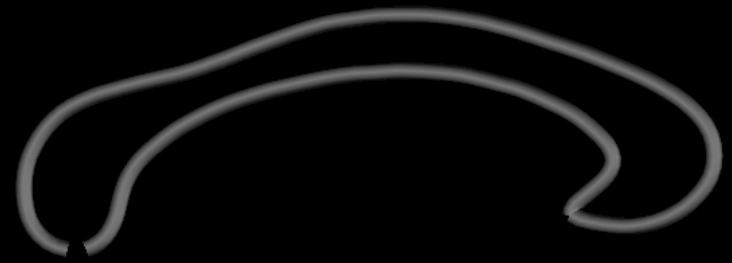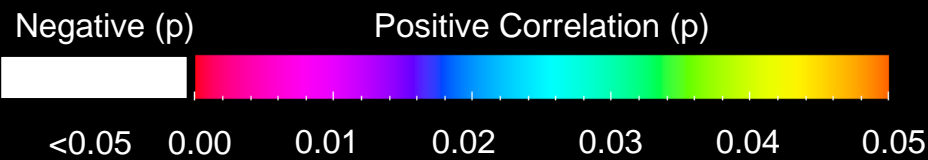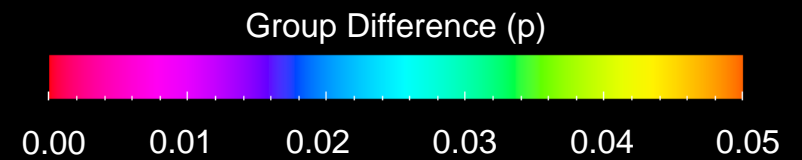

Supplement: NIHMS229562-supplement-Supp1.pdf [file NIHMS229562-supplement-Supp1.pdf]
